# Supplementary material
Source: PubMed Central journal article supplement (PMC7611326)
Supplement: EMS128563-supplement-Supplementary_Information.pdf [file EMS128563-supplement-Supplementary_Information.pdf]

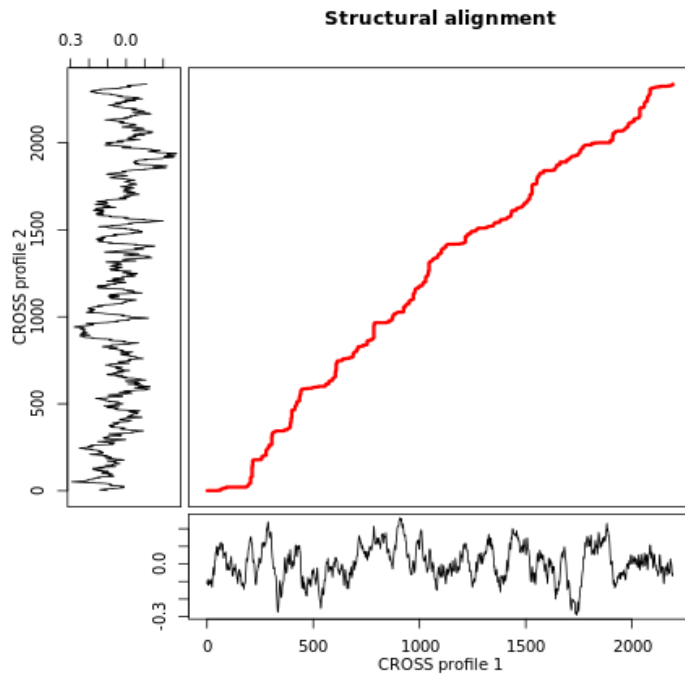

**Supplementary Figure S1. Structure conservation between human and mouse HOTAIR.** The most structurally conserved region in HOTAIR corresponds to Snail binding site predicted by catRAPID. The positions are relative to the alignments between the two sequences.

a

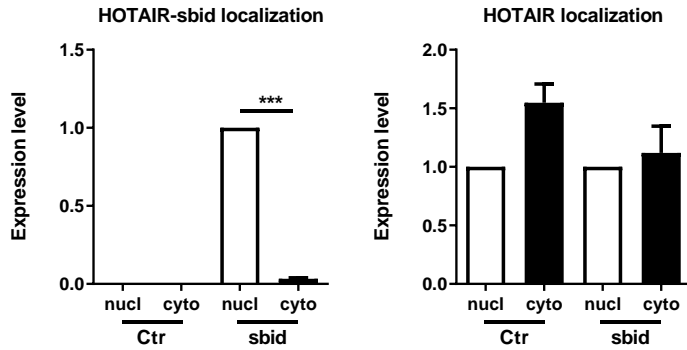

b

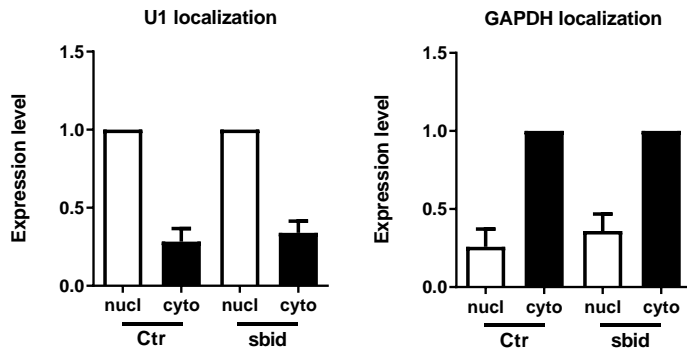

**Supplementary Figure S2. HOTAIR-sbid retains a nuclear localization.**

(a) qRT-PCRs on the Snail-binding domain of HOTAIR (HOTAIR-sbid) and on the endogenous HOTAIR in the nuclear (nucl) and cytoplasmic (cyto) fractions obtained from Hep3B cells expressing the HOTAIR-sbid (sbid) or the empty vector (Ctr) as a control. (b) qRT-PCR for U1 (nuclear marker) and of GAPDH (cytoplasmic marker) in the nuclear and cytoplasmic fractions using qRT-PCR. The error bars represent the calculated standard error of the mean based on three independent experiments.

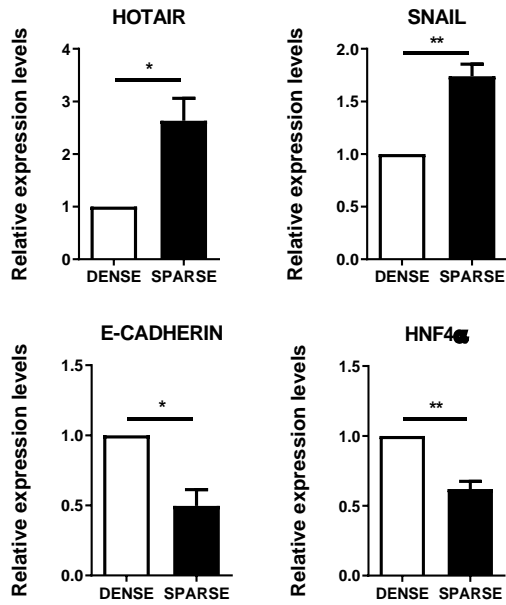

**Supplementary Figure S3. Hep3B grown at low density express HOTAIR and Snail and repress epithelial markers.**

RT-qPCR analysis for the indicated mesenchymal (HOTAIR and SNAIL) and epithelial (E-CADHERIN, HNF4 $\alpha$ ) genes on human Hep3B cells grown at high (dense) or low density (sparse). The values are calculated by the  $2^{-\Delta Ct}$  method, expressed as fold of expression versus the control (arbitrary value=1) and shown as mean $\pm$ s.e.m. Statistically significant differences are reported (\*P<0.05, \*\*P<0.01) for four independent experiments.

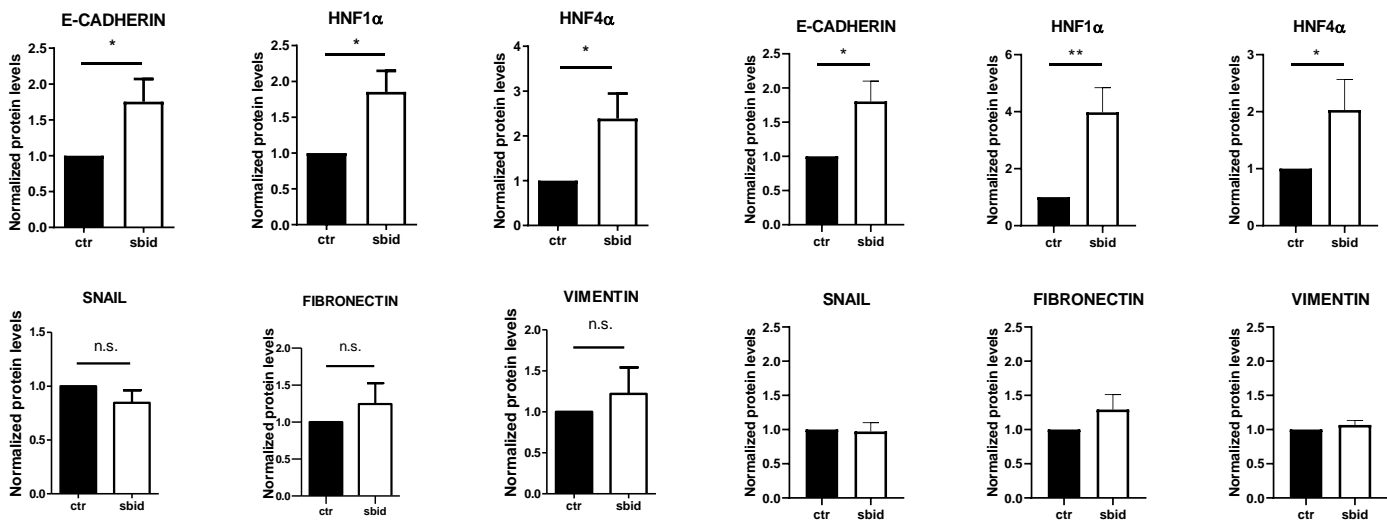

#### Supplementary Figure S4. Densitometric analysis of protein levels.

Densitometric analysis of protein levels in BW1J (left) and Hep3B (right) cells expressing HOTAIR-*sbid* or the empty vector as a control (Ctr). The values are expressed as fold of expression versus the control (arbitrary value=1) and shown as mean±s.e.m. Statistically significant differences are reported (\* $P < 0.05$ , \*\* $P < 0.01$ , \*\*\* $P < 0.001$ ) for four (BW1J) and seven (Hep3B) independent experiments.

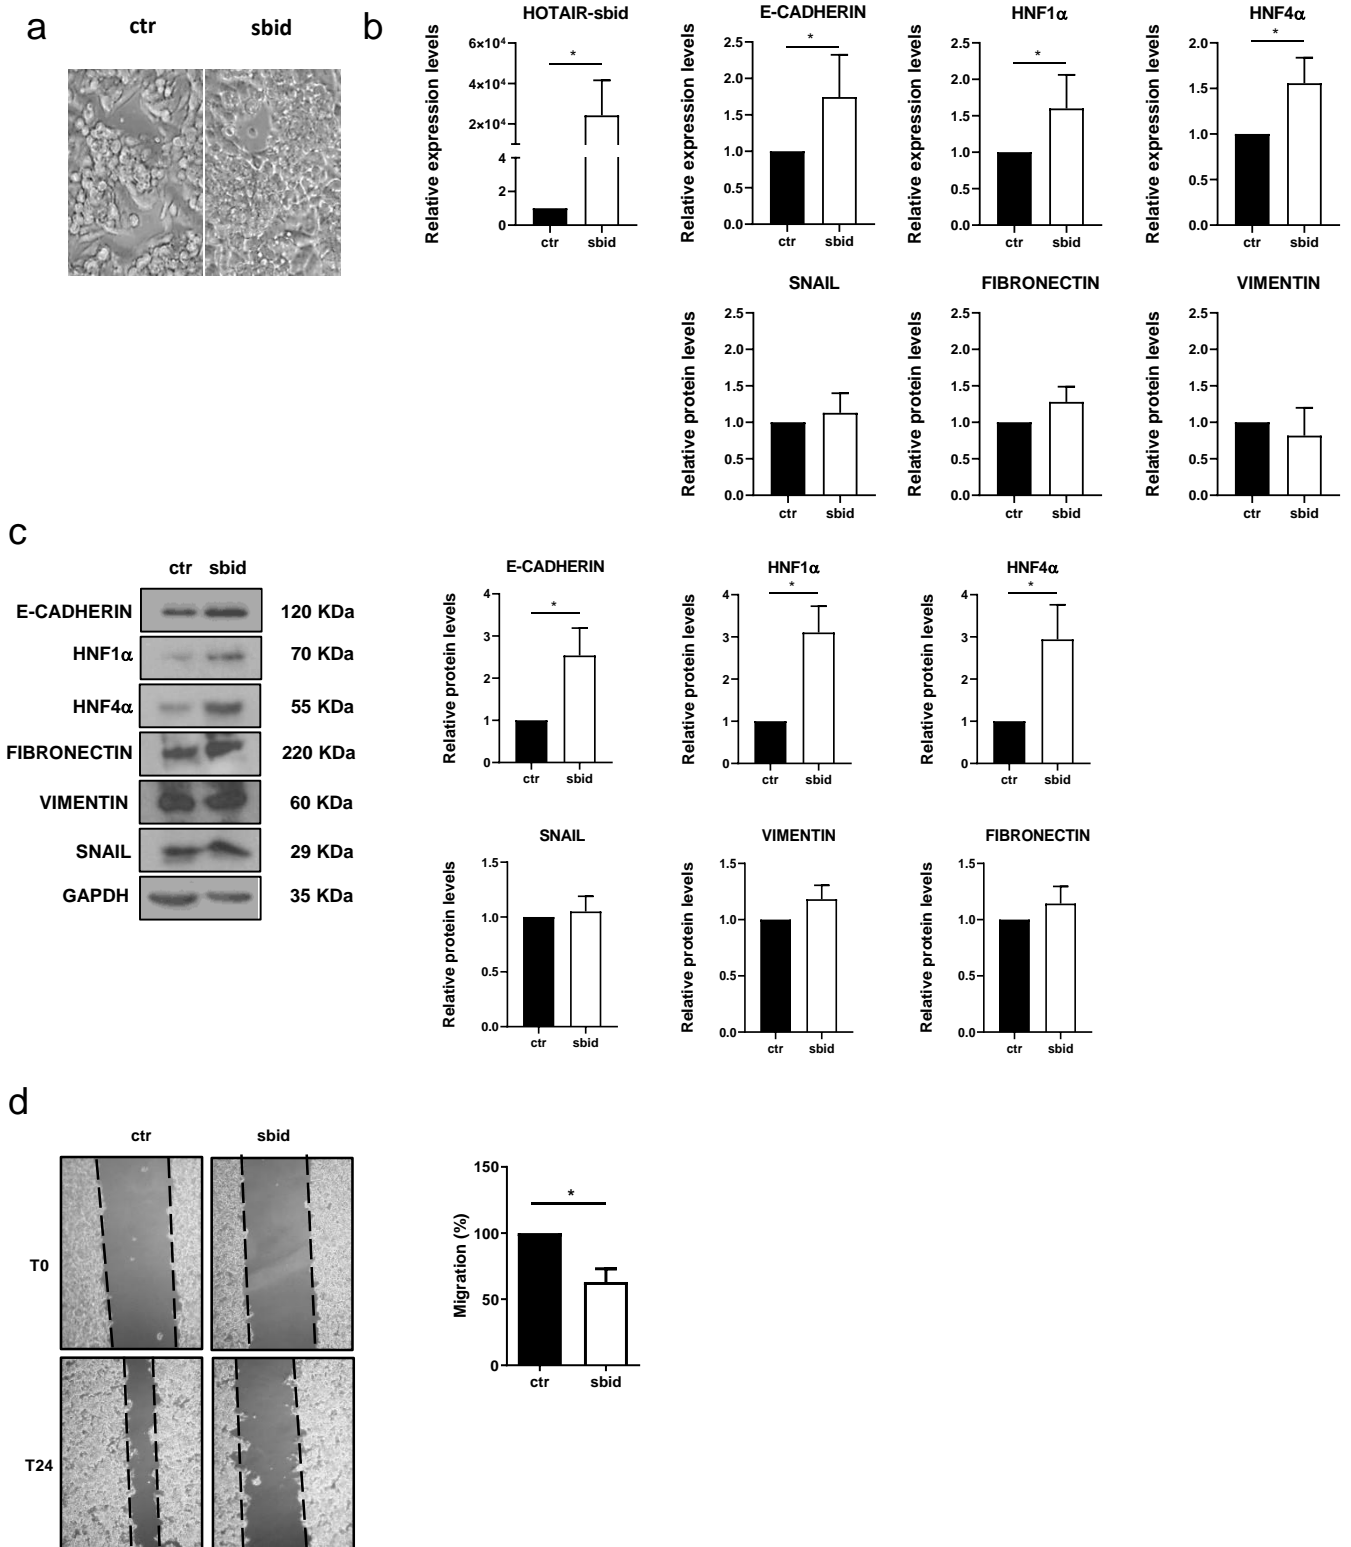

### Supplementary Figure S5. HOTAIR-*sbid* interferes with the SNAIL/HOTAIR/EZH2-mediated functions

Analysis of HepG2 cells treated with TGF $\beta$  and expressing HOTAIR-*sbid* (*sbid*) or the empty vector as a control (*ctr*) as indicated. (a) Phase contrast micrographs; (b) RT-qPCR analysis for the indicated epithelial (e-cadherin, hnf4 $\alpha$ , hnf1 $\alpha$ ) and mesenchymal (snail, vimentin and fibronectin) genes; the values are calculated by the  $2^{-\Delta\Delta Ct}$  method, expressed as fold of expression versus the control (arbitrary value=1) and shown as mean $\pm$ s.e.m. Statistically significant differences are reported (\*P<0.05) for four independent experiments; (c) *Left*: Western blot analysis (WB) for E-CADHERIN, HNF1 $\alpha$ , HNF4 $\alpha$ , FIBRONECTIN, VIMENTIN, SNAIL on protein extracts. GAPDH was used as a loading control. All the experiments have been performed four times and WB images represent one indicative experiment of the independent ones. *Right*: Densitometric analysis of protein expression relative to the independent experiments. (d) *Left*: Scratch assay at the indicated time. *Right*: quantification of migration ability relative to four independent experiments.

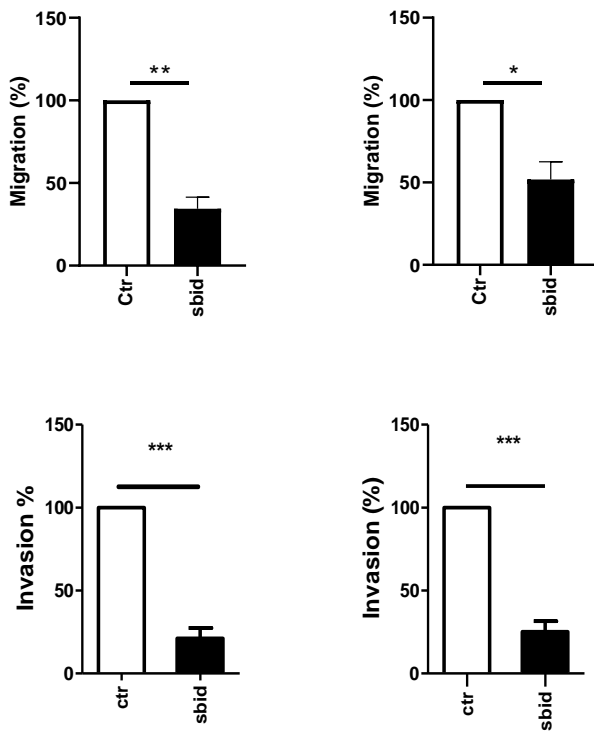

**Supplementary Figure S6. Quantification of migration and invasion abilities.**

Quantification of migrating ability (top) or invasive ability (bottom) in BW1J (left panels) and Hep3B (right panels) cells expressing HOTAIR-*sbid* or the empty vector as a control (Ctr). Statistically significant differences are reported (\* $P < 0.05$ , \*\* $P < 0.01$ , \*\*\* $P < 0.001$ ) for three independent experiments (for invasion assays three fields for each experiment were analyzed).

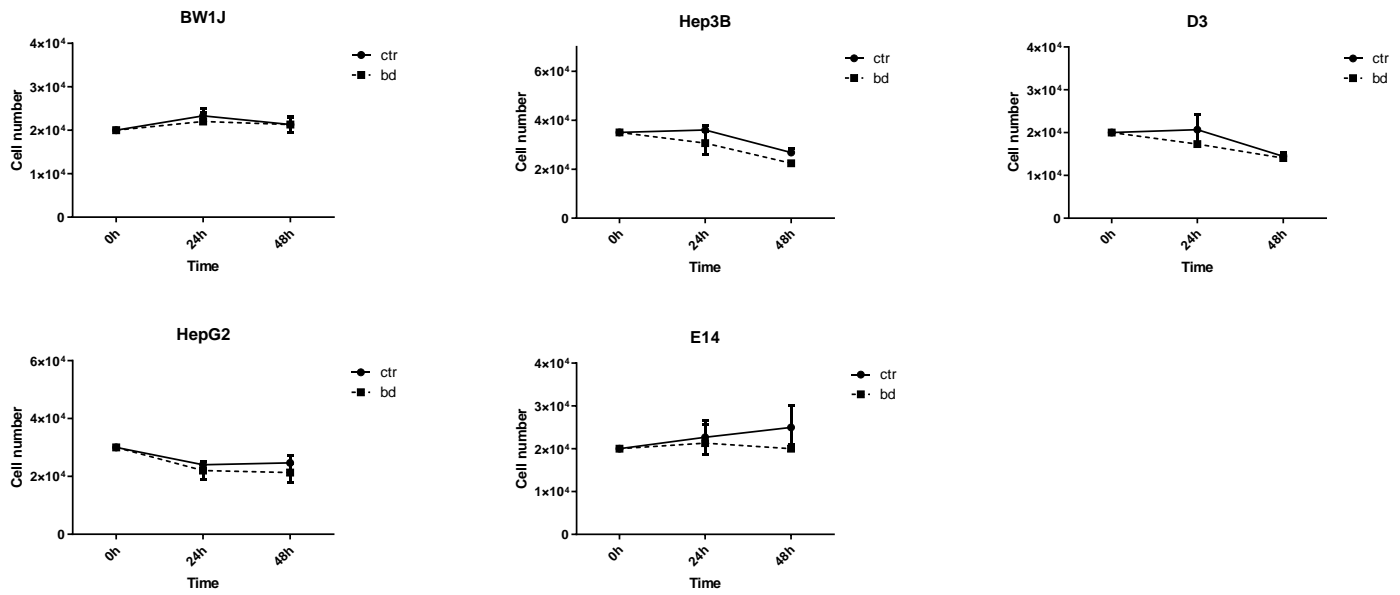

### Supplementary Figure S7. Proliferation assays

Proliferation assays in BW1J, Hep3B, D3, HepG2 and E14 cells expressing HOTAIR-*bid* or the empty vector as a control (Ctr). Cells were grown in the absence of FBS to avoid proliferation as in Figure 3, 6 and Supplementary Figures S7 and S8. Differences are not statistically significant for three independent experiments.

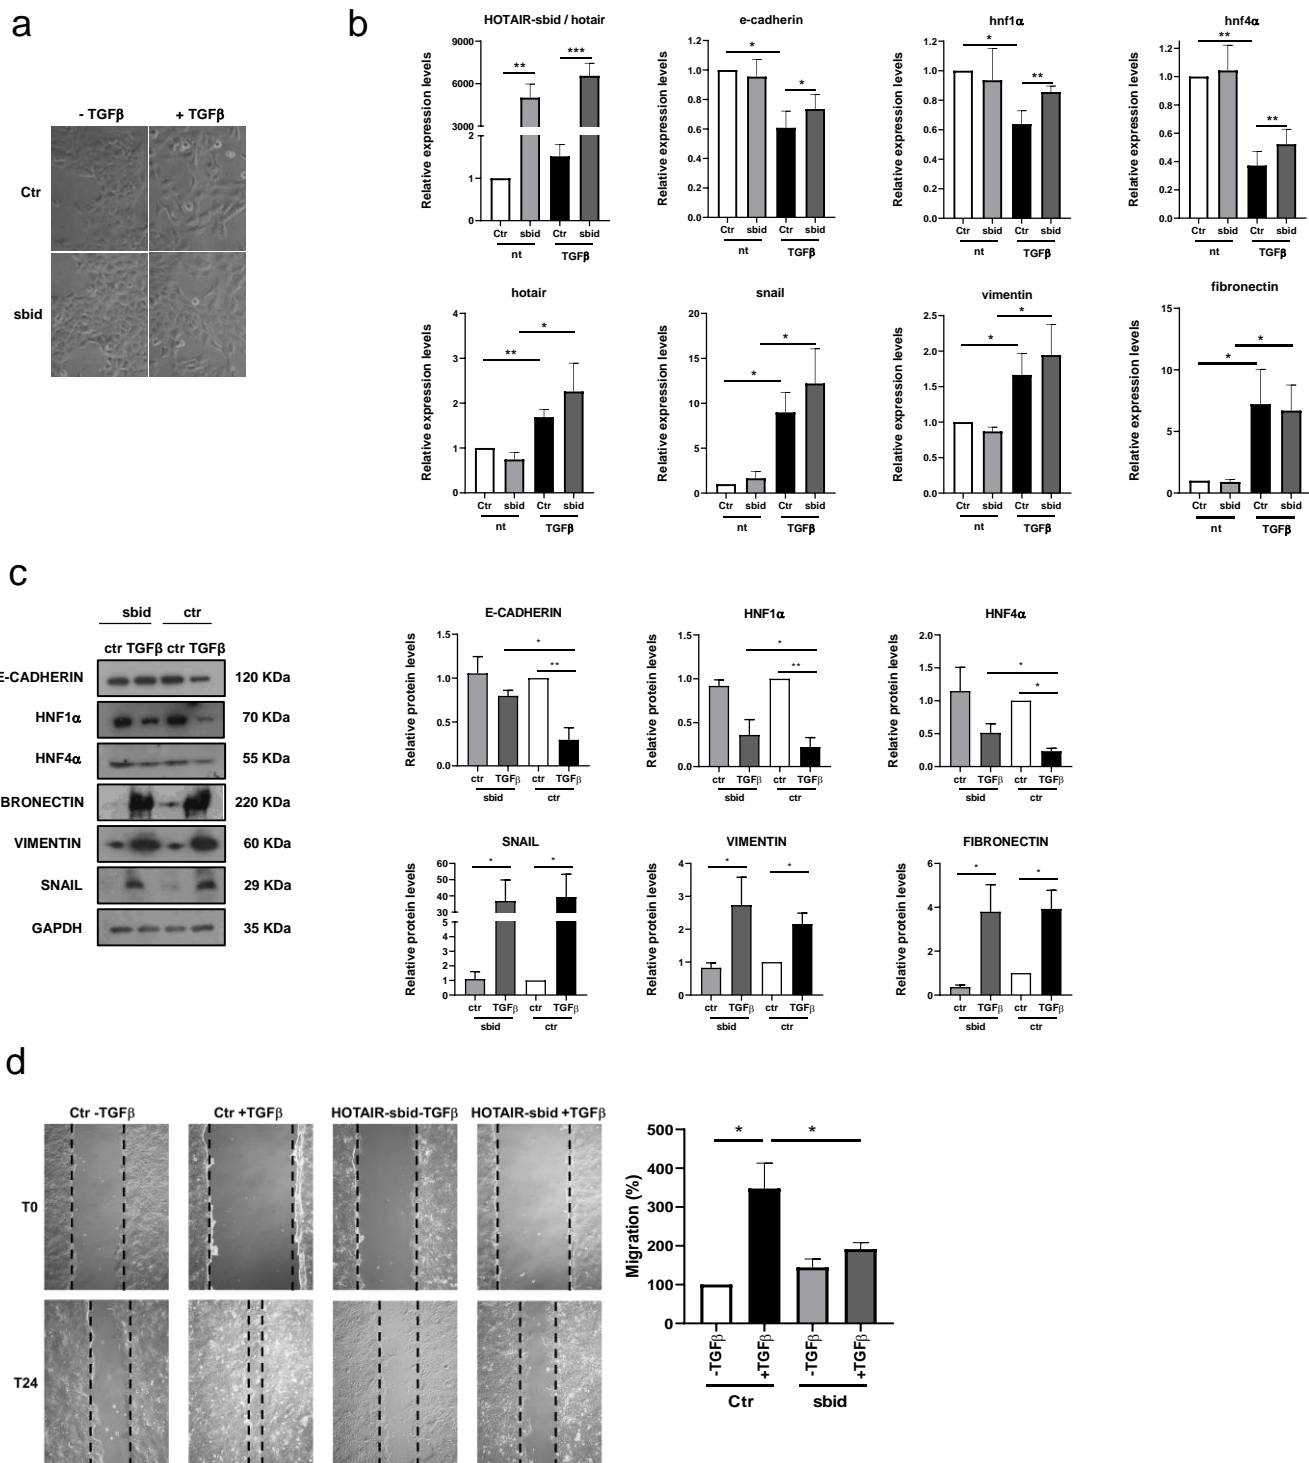

### Supplementary Figure S8. HOTAIR-*sbid* interferes with the SNAIL/HOTAIR/EZH2-mediated functions in EMT

E14 treated with TGF $\beta$  (+TGF $\beta$ ) or left untreated (-TGF $\beta$ ) and expressing HOTAIR-*sbid* or the empty vector as a control (Ctr). (a) Phase contrast micrographs; (b) RT-qPCR analysis for the indicated epithelial (e-cadherin, hnf4 $\alpha$ , hnf1 $\alpha$ ), mesenchymal (snail, vimentin and fibronectin) genes and for HOTAIR and HOTAIR-*sbid*. The values are calculated by the  $2^{-\Delta\Delta Ct}$  method, expressed as fold of expression versus the control (arbitrary value=1) and shown as mean $\pm$ s.e.m. Statistically significant differences are reported (\*P<0.05, \*\*P<0.01) for five independent experiments.

(c) *Left*: Western blot analysis (WB) for E-CADHERIN, HNF1 $\alpha$ , HNF4 $\alpha$ , FIBRONECTIN, VIMENTIN, SNAIL on protein extracts. GAPDH was used as a loading control. All the experiments have been performed three times and WB images represent one indicative experiment of the independent ones. *Right*: Densitometric analysis of protein expression relative to the independent experiments. (d) *Left*: Scratch assay at the indicted time; *Right*: quantification of migration abilities relative to four independent experiments.



| List of primers used in RIP and gene expression analysis |                           |                |                |
|----------------------------------------------------------|---------------------------|----------------|----------------|
| Gene name                                                | Sequence                  | Efficiency (%) | r <sup>2</sup> |
| <i>HOTAIR-sbid FW</i>                                    | GAAGACACGCACGGAGAAAG      | 91             | 0,99           |
| <i>HOTAIR-sbid REV</i>                                   | ACTGGGGTTTGTCTGGAGTT      |                |                |
| <i>hsa-L34 FW</i>                                        | GTCCCGAACCCCTGGTAATAG     | 107            | 0,992          |
| <i>hsa-L34 REV</i>                                       | GGCCCTGCTGACATGTTTCTT     |                |                |
| <i>mmu-e-cadherin FW</i>                                 | CTACTGTTTCTACGGAGGAG      | 102,9          | 0,996          |
| <i>mmu-e-cadherin REV</i>                                | CTCAAATCAAAGTCCTGGTC      |                |                |
| <i>mmu-hnf4a FW</i>                                      | TCTTCTTTGATCCAGATGCC      | 90,7           | 0,988          |
| <i>mmu-hnf4a REV</i>                                     | GGTCGTTGATGTAATCCTCC      |                |                |
| <i>mmu-hnf1a FW</i>                                      | TATCATGGCCTCGCTACCTG      | 97,1           | 0,995          |
| <i>mmu-hnf1a REV</i>                                     | ACTCCCCATGCTGTTGATGA      |                |                |
| <i>mmu-snail FW</i>                                      | CCACTGCAACCGTGCTTTT       | 109,5          | 0,998          |
| <i>mmu-snail REV</i>                                     | CACATCCGAGTGGGTTTGG       |                |                |
| <i>mmu-fibronectin FW</i>                                | AGACCATACCTGCCGAATGTAG    | 95,3           | 0,996          |
| <i>mmu-fibronectin REV</i>                               | GAGAGCTTCTGTCTGTAGAG      |                |                |
| <i>mmu-vimentin FW</i>                                   | AGCAGTATGAAAGCGTGGCT      | 90,5           | 0,997          |
| <i>mmu-vimentin REV</i>                                  | CTCCAGGGACTCGTTAGTGC      |                |                |
| <i>mmu-18S FW</i>                                        | ACGACCCATTCTGAACGTCTG     | 94,7           | 0,996          |
| <i>mmu-18S REV</i>                                       | GCACGGCGACTACCATCG        |                |                |
| <i>mmu-hotair FW</i>                                     | GCGCCAACGTAGACCAAAAG      | 109,4          | 0,989          |
| <i>mmu-hotair REV</i>                                    | TACCGATGTTGGGGACCTCT      |                |                |
| <i>hsa-E-CADHERIN FW</i>                                 | TACGCCTGGGACTCCACCTA      | 108,6          | 0,981          |
| <i>hsa-E-CADHERIN REV</i>                                | CCAGAAACGGAGGCCTGAT       |                |                |
| <i>hsa- HNF4a FW</i>                                     | CATGGACATGGCCGACTACA      | 110            | 0,987          |
| <i>hsa-HNF4a REV</i>                                     | ATTGCCCATCGTCAACACCT      |                |                |
| <i>hsa-HNF1a FW</i>                                      | GCCCACCAAGCAGGTCTTCA      | 104,5          | 0,985          |
| <i>hsa-HNF1a REV</i>                                     | AGGGTCCTGGCTGGGGAC        |                |                |
| <i>hsa-SNAIL FW</i>                                      | CACTATGCCGCGCTCTTTC       | 104,9          | 0,985          |
| <i>hsa-SNAIL REV</i>                                     | GCTGGAAGGTAAACTCTGGATTAGA |                |                |
| <i>hsa-FIBRONECTIN FW</i>                                | GGCTGACAGAGAAGATTCCCG     | 96,9           | 0,995          |
| <i>hsa-FIBRONECTIN REV</i>                               | AGCTGGGTCTGCTAACATCAC     |                |                |
| <i>hsa-VIMENTIN FW</i>                                   | GCTAACCAACGACAAAGCCC      | 100,2          | 0,997          |
| <i>hsa-VIMENTIN REV</i>                                  | GATTGCAGGGTGTTTTCGGC      |                |                |
| <i>hsa-L32 FW</i>                                        | GGAGCGACTGCTACGGAAG       | 90,8           | 0,997          |
| <i>hsa-L32 REV</i>                                       | GATACTGTCCAAAAGGCTGGAA    |                |                |
| <i>hsa-HOTAIR FW</i>                                     | CGGGACTTAGACCCTCAGGT      | 93,6           | 0,985          |
| <i>hsa-HOTAIR REV</i>                                    | GTTCCATTCCACTGCGAAGC      |                |                |
| <i>hsa-U1 FW</i>                                         | TTTTCCCAGGGCGAGGCTTA      | 109,8          | 0,996          |
| <i>hsa-U1 REV</i>                                        | CCCCACTACCACAAATTATGCA    |                |                |
| <i>hsa-GAPDH FW</i>                                      | GGGGAGATTCAGTGTGGTGG      | 93,3           | 0,982          |
| <i>hsa-GAPDH REV</i>                                     | GTGGCTGGCTCAGAAAAGG       |                |                |

**Table S1. List of primers, sequence, primer pairs efficiency and r<sup>2</sup> values**

| List of primers used in ChIP analysis |                         |                |                |
|---------------------------------------|-------------------------|----------------|----------------|
| Promoter name                         | Sequence                | Efficiency (%) | r <sup>2</sup> |
| mmu-E-cadherin promoter Ebox FW       | GAACGACCGTGAATAGGAA     | 109,3          | 0,981          |
| mmu-E-cadherin promoter Ebox REV      | CTCCCACACCAGTGAGCAG     |                |                |
| mmu-hnf4a promoter Ebox FW            | GGAGATGGAAACTGAGGCTTG   | 109,8          | 0,985          |
| mmu-hnf4a promoter Ebox REV           | GTCACATGCTTTGGGAACCG    |                |                |
| mmu-hnf1a promoter Ebox FW            | GCACTTGGGAGCTAGAGGTA    | 97,3           | 0,988          |
| mmu-hnf1a promoter Ebox REV           | TGTGTGTGTATCTCTCTGTGTCT |                |                |
| mmu-rpl30 promoter FW                 | TAAGGCAGGAAGATGGTGG     | 96,8           | 0,991          |
| mmu-rpl30 promoter REV                | CAGTGTGCTCAAATCTATCC    |                |                |
| hsa-E-cadherin promoter Ebox1 FW      | GGCAAGACAGAGCGAGAC      | 100,5          | 0,991          |
| hsa-E-cadherin promoter Ebox1 REV     | TCGAACTCCTGGGCTGAA      |                |                |
| hsa-E-cadherin promoter Ebox2 FW      | GGTGAACCCTCAGCCAATCA    | 91             | 0,993          |
| hsa-E-cadherin promoter Ebox2 REV     | CACAGGTGCTTTGCAGTTCC    |                |                |
| hsa-HNF1a promoter Ebox FW            | TCAGAGCCTCGATTTCTCC     | 105,4          | 0,986          |
| hsa-HNF1a promoter Ebox REV           | GACCCTTCCACCCCACTC      |                |                |
| hsa-HNF4a promoter Ebox FW            | CAAGCAGGTGGTGAGATCC     | 107,5          | 0,993          |
| hsa-HNF4a promoter Ebox REV           | CGTCTCCTCTGGTCTCCTTC    |                |                |
| hsa-RPL30 promoter FW                 | GCAGGAAGATGGTGGCCGCAA   | 94,1           | 0,994          |
| hsa-RPL30 promoter REV                | AGTCTGCTTGTACCCAGGACGT  |                |                |

**Table S2. List of primers, sequence, primer pairs efficiency and r<sup>2</sup> values**
